# Supplementary material for: Lignin Nanoparticles and Alginate Gel Beads: Preparation, Characterization and Removal of Methylene Blue
Source: MDPI journal article supplement (doi:10.3390/nano12010176), 2022-01-05
Supplement: s1 [file s1]

# Supporting information

## Lignin Nanoparticles and Alginate Gel Beads: Preparation, Characterization and Removal of Methylene Blue

Tong Luo <sup>1</sup>, Yanping Hao <sup>1</sup>, Chao Wang <sup>1,\*</sup>, Weikun Jiang <sup>1</sup>, Xingxiang Ji <sup>1</sup>, Guihua Yang <sup>1</sup>, Jiachuan Chen <sup>1</sup>, Srinivas Janaswamy <sup>2,\*</sup> and Gaojin Lyu <sup>1,\*</sup>

- <sup>1</sup> State Key Laboratory of Biobased Material and Green Papermaking, Qilu University of Technology, Shandong Academy of Sciences, Jinan 250353, China; luotongiant@gmail.com (T.L.); yanpingh2021@gmail.com (Y.H.); weikun0709@126.com (W.J.); jxx@qlu.edu.cn (X.J.); ygh@qlu.edu.cn (G.Y.); chenjc@qlu.edu.cn (J.C.)
- <sup>2</sup> Department of Dairy and Food Science, South Dakota State University, Brookings, SD 57007, USA
- \* Correspondence: chaowang@qlu.edu.cn (C.W.); Srinivas.Janaswamy@sdstate.edu (S.J.); gaojinlv@qlu.edu.cn (G.L.); Tel.: +86-0531-8963-1681 (C.W.); +86-0531-8963-1681 (G.L.)

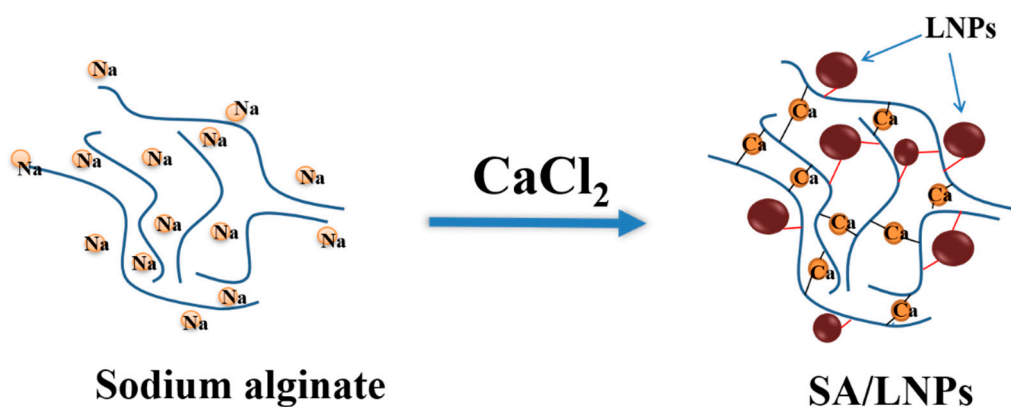

Figure S1. Mechanisms of cross-linking of LNPs and SA.

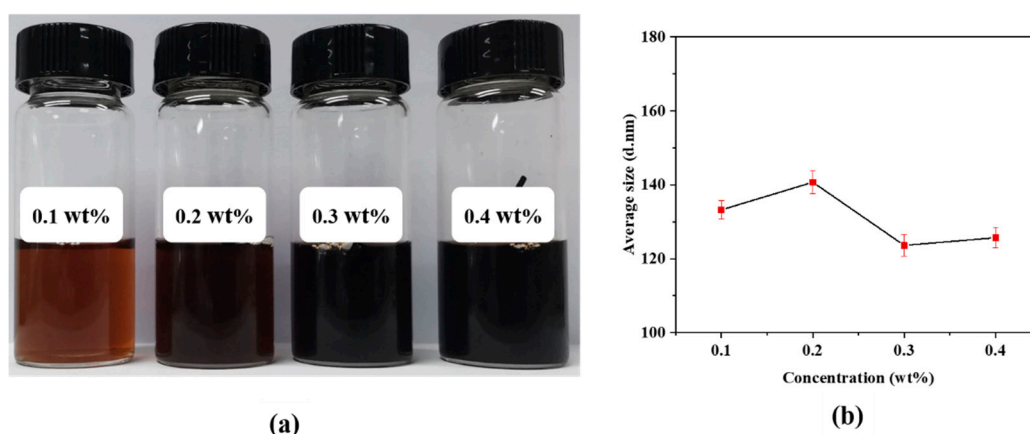

Figure S2. (a) Digital image of LNPs suspension with different concentrations and (b) average particle size distribution of LNPs at different concentrations of aqueous solution.

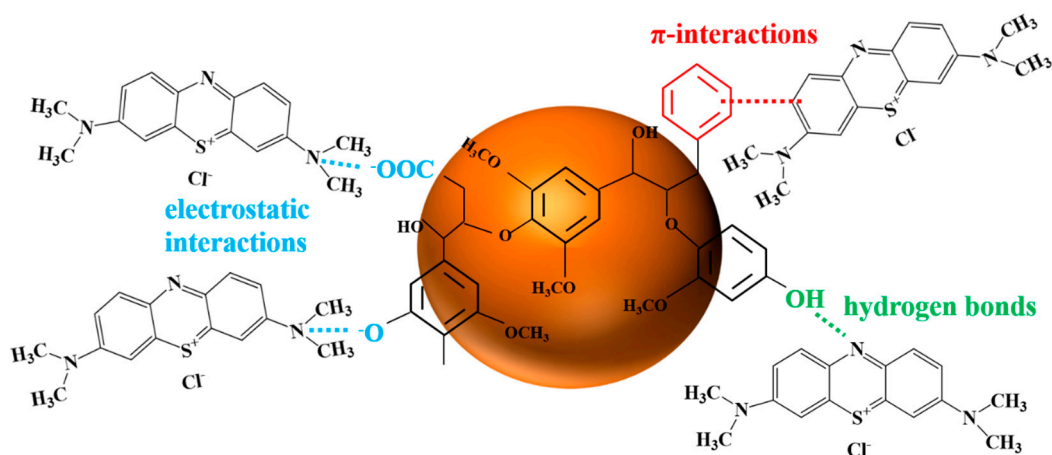

**Figure S3.** Proposed mechanism of MB interactions between the dye and the LNPs.

**Table S1.** The chemical composition of lignin.

| Lignin       | Acid insoluble lignin | Acid soluble lignin | Sugar | Ash  |
|--------------|-----------------------|---------------------|-------|------|
| Kraft lignin | 83.6%                 | 5.8%                | 1.1%  | 7.4% |

**Table S2.** The information related to MB dye.

| IUPAC name                                     | Maximum absorption wavelength | Formula              | Molar mass   | Molecular structure |
|------------------------------------------------|-------------------------------|----------------------|--------------|---------------------|
| 3,7-Bis(dimethylamino)phenazathionium chloride | 664 nm                        | $C_{16}H_{18}N_3SCl$ | 319.85 g/mol |                     |

**Table S3.** TGA results of SA/LNPs composite beads.

| Sample | $T_i$ ( $^{\circ}C$ ) | $1^{\circ}T_{max}$ ( $^{\circ}C$ ) | Maximum rate1 (wt%/ $^{\circ}C$ ) | $2^{\circ}T_{max}$ ( $^{\circ}C$ ) | Maximum rate2 (wt%/ $^{\circ}C$ ) | Wresidue (wt%) |
|--------|-----------------------|------------------------------------|-----------------------------------|------------------------------------|-----------------------------------|----------------|
|--------|-----------------------|------------------------------------|-----------------------------------|------------------------------------|-----------------------------------|----------------|

|            |       |       |      |       |      |      |
|------------|-------|-------|------|-------|------|------|
| SA powder  | 237.1 | 259.3 | 1.59 | /     | /    | 33.7 |
| SA beads   | 225.3 | 233.7 | 0.47 | 299.4 | 0.36 | 37.1 |
| SA/LNPs-10 | 239.7 | 247.8 | 0.33 | 299.7 | 0.34 | 38.1 |
| SA/LNPs-20 | 235.4 | 252.5 | 0.39 | 304.5 | 0.34 | 43.3 |
| SA/LNPs-30 | 230.2 | 245.6 | 0.29 | 301.8 | 0.30 | 45.2 |
| SA/LNPs-40 | 239.2 | 258.6 | 0.23 | 300.6 | 0.27 | 48.5 |

**Table S4.** Parameters of various adsorption kinetic models.

| Kinetic model                  | Parameters                      | SA/LNPs-40 | SA     |
|--------------------------------|---------------------------------|------------|--------|
| Pseudo-first-order model       | $q_e^a$ (mg/g)                  | 48.6       | 44.9   |
|                                | $q_e^b$ (mg/g)                  | 31.5       | 26.8   |
|                                | $k_1$                           | 0.0296     | 0.0256 |
|                                | $R^2$                           | 0.914      | 0.953  |
|                                | $q_e^b$ (mg/g)                  | 48.5       | 44.6   |
| Pseudo-second-order model      | $k_2$                           | 0.0055     | 0.0034 |
|                                | $R^2$                           | 0.997      | 0.991  |
|                                | $k_{p1}(\text{mg/g min}^{1/2})$ | 2.637      | 2.037  |
| Intraparticle diffusion Step 1 | $C_1$                           | 25.258     | 21.935 |
|                                | $R_1^2$                         | 0.985      | 0.927  |
|                                | $k_{p2}(\text{mg/g min}^{1/2})$ | 0.647      | 0.210  |
| Intraparticle diffusion Step 2 | $C_2$                           | 40.499     | 41.082 |
|                                | $R_2^2$                         | 0.986      | 0.835  |
|                                | $k_{p3}(\text{mg/g min}^{1/2})$ | 0.170      | /      |
| Intraparticle diffusion Step 3 | $C_3$                           | 45.758     | /      |
|                                | $R_3^2$                         | 0.871      | /      |

<sup>a</sup> Experiments results, <sup>b</sup> Calculated results.

**Table S5.** Isotherm model parameters for adsorption.

| Isotherm   | Parameters                                            | SA/LNPs-40 |
|------------|-------------------------------------------------------|------------|
| Langmuir   | $q_m$ (mg/g)                                          | 276.1      |
|            | $b$ (L/mg)                                            | 0.287      |
|            | $R^2$                                                 | 0.978      |
| Freundlich | $K_F$ ( $\text{mg}^{1-1/n} \text{L}^{1/n}/\text{g}$ ) | 21.01      |

|        |            |        |
|--------|------------|--------|
| Temkin | $n$        | 2.196  |
|        | $R^2$      | 0.988  |
|        | $A$ (mg/L) | 0.223  |
|        | $B$        | 51.296 |
|        | $R^2$      | 0.764  |

$$q_t = q_e(1 - e^{-k_1 t}) \rightarrow \ln(q_e - q_t) = \ln q_e - k_1 t \quad (S1)$$

$$q_t = \frac{k_2 q_e^2}{(1 + k_2 q_e t)} t \rightarrow \frac{t}{q_t} = \frac{1}{k_2 q_e^2} + \frac{t}{q_e} \quad (S2)$$

$$q_t = k_p t^{1/2} + C \quad (S3)$$

Wherein,  $q_t$  and  $q_e$  refer the amount of adsorbed MB (mg/g) at any given time and at adsorption equilibrium, respectively. The  $k_1$ ,  $k_2$  and  $k_p$  correspond to the pseudo-first-order, pseudo-second-order and the Intra-particle diffusion model rate constants, respectively. The  $C$  is the intercept (mg/g) related to the adsorption steps signifying boundary layer.

Langmuir isotherm:

$$q_e = q_{max} \left( \frac{b C_e}{1 + b C_e} \right) \rightarrow \frac{q_e}{C_e} = \frac{q_{max}}{b} + \frac{1}{b} \quad (S4)$$

Freundlich isotherm:

$$q_e = K_F C_e^{1/n} \rightarrow \ln q_e = \ln K_F + \frac{1}{n} \ln C_e \quad (S5)$$

Temkin isotherm:

$$q_e = B \ln A + B \ln C_e \quad (S6)$$

Herein,  $q_{max}$  (mg/g) and  $b$  (dm<sup>3</sup>/mg) refer the constants of Langmuir isotherm;  $K_F$  (mg/g (dm<sup>3</sup>/mg)<sup>1/n</sup>) is the adsorption capacity and  $1/n$  is related to the adsorption intensity;  $A$  (mg/L) the equilibrium constant of the Temkin isotherm that is associated with binding energy and  $B$  the constant of the Temkin isotherm is related to adsorption heat.

$$R_L = \frac{1}{(1 + b C_0)} \quad (S7)$$

$R_L$  represents the shape of isotherm with the following meanings, i.e.  $R_L=0$  (irreversible);  $R_L>1$  (unfavorable);  $R_L=1$  (linear);  $0<R_L<1$  (favorable).
